# Supplementary material
Source: PubMed Central journal article supplement (PMC6763258)

## **Supplemental Figure Legends**

**Supplemental Data Figure 1-** **A.** Representative FACS plots of B16 cells stained with Annexin V/PI following 48 h culture with CD4<sup>+</sup> T cells isolated from day 10 tumor-bearing mice. **B.** Bright field images of CD4<sup>+</sup> T cells from day 10 B16 tumor-bearing mice incubated for 48 h with B16 tumor cells at 1:2 ratio (x200), n=3.

**Supplemental Data Figure 2-** **A.** Expression levels of FcγRI on tumor-infiltrating CD4<sup>+</sup> T cells (blue) and myeloid cells (red). **B.** Co-expression of FcγR on tumor-infiltrating CD4<sup>+</sup> T cells **C.** Confocal images of day 10 B16 tumors (x800). **D.** Confocal images of day 12 4T1 tumor sections (x800).

**Supplemental Data Figure 3-** **A.** Percentages of FcγR-expressing CD4<sup>+</sup> T cells from various organs of naïve male and female mice. **B.** Confocal images of CD4<sup>+</sup> T cells immediately following their sorting from the spleen of naïve mice. **C.** Non-reduced Gel-PAGE following overnight digestion of TA99 antibodies with pepsin (right lane). Confocal microscopy of splenic FcγRI<sup>+</sup> CD4<sup>+</sup>T cells incubated for 48 h with B16 and pepsin-digested TA99. **D.** Confocal microscopy of splenic FcγRI<sup>neg</sup> CD4<sup>+</sup> T cells incubated with TA99 antibodies (left panel) and of FcγRI<sup>+</sup> CD4<sup>+</sup>T cells incubated with anti-IFNγ blocking antibodies (right panel). **E.** Confocal microscopy Wassabi-labeled B16 cells stained with antibodies against TRP1. **F.** FACS analysis of B16 cells stained anti-MHCII antibodies.

**Supplemental Data Table 1-** A list of CDR3 TCRVβ amino acid sequences of splenic CD4<sup>+</sup> T cells with or without FcγRI expression.

**Supplemental Data Table 2-** A list of genes found in CD4<sup>+</sup> T cells with or without FcγRI expression that were found in mass spectrometry analysis

**Supplemental Data Figure 4-** **A.** Representative FACS analysis of infected CD4<sup>+</sup> T cells prior to their sorting. **B.** Confocal images of infected CD4<sup>+</sup> T cells incubated for 48 h with B16 cells (x800). **C.** Representative FACS plots of B16 cells stained with Annexin V/PI following 48 h culture with infected CD4<sup>+</sup> T cells (n=3).

**Supplemental Data Figure 5-** **A.** Histological sections of stage III melanoma tumor. **B.** Histological sections of stage III bladder cancer.

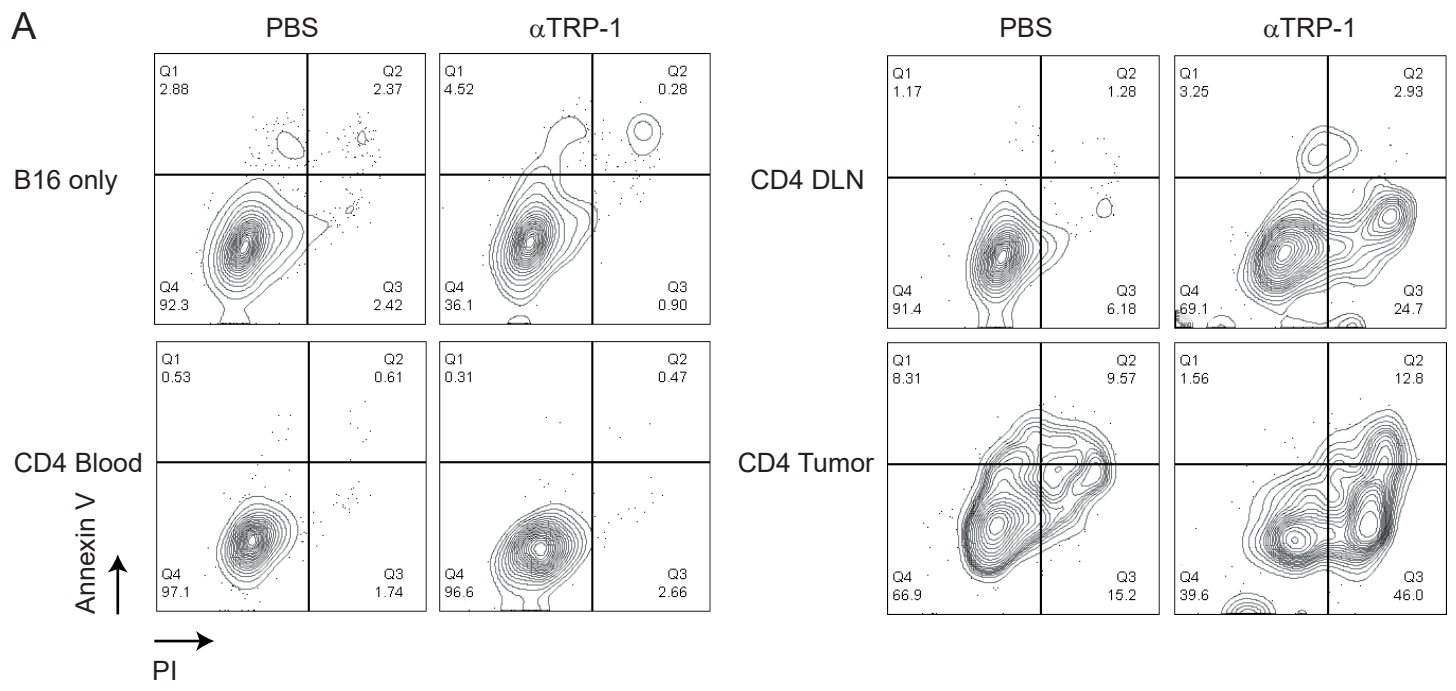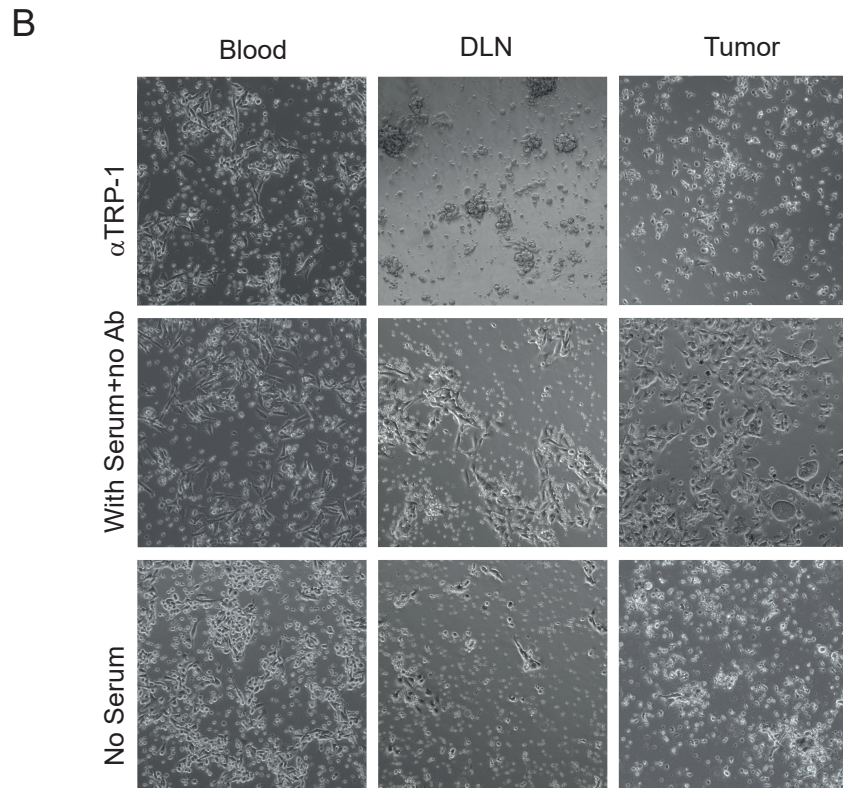

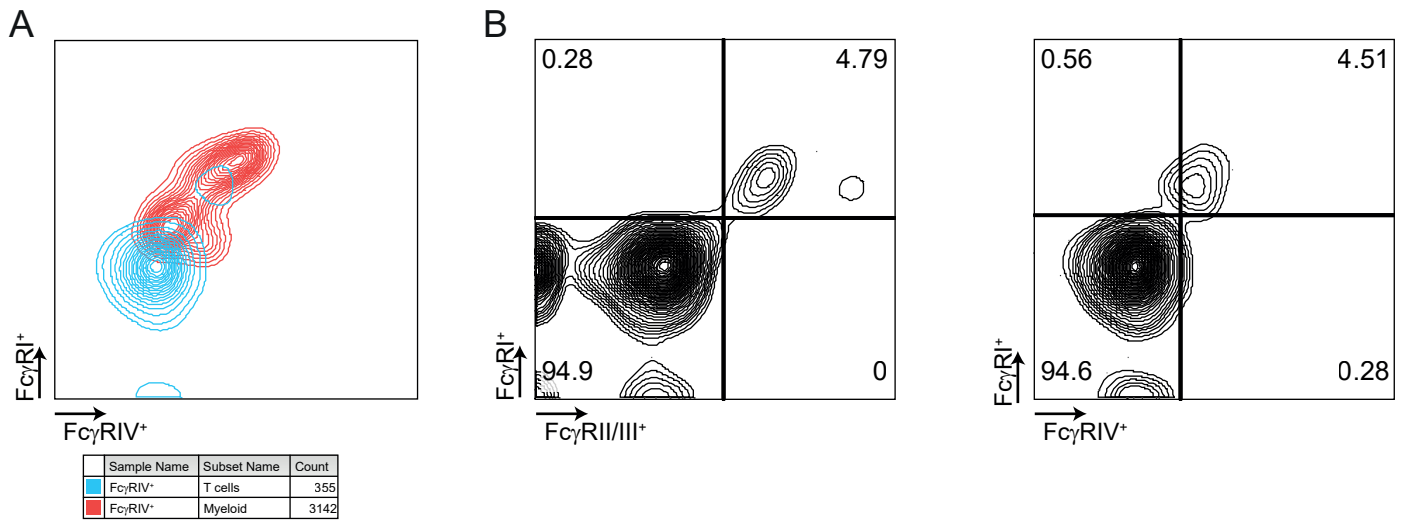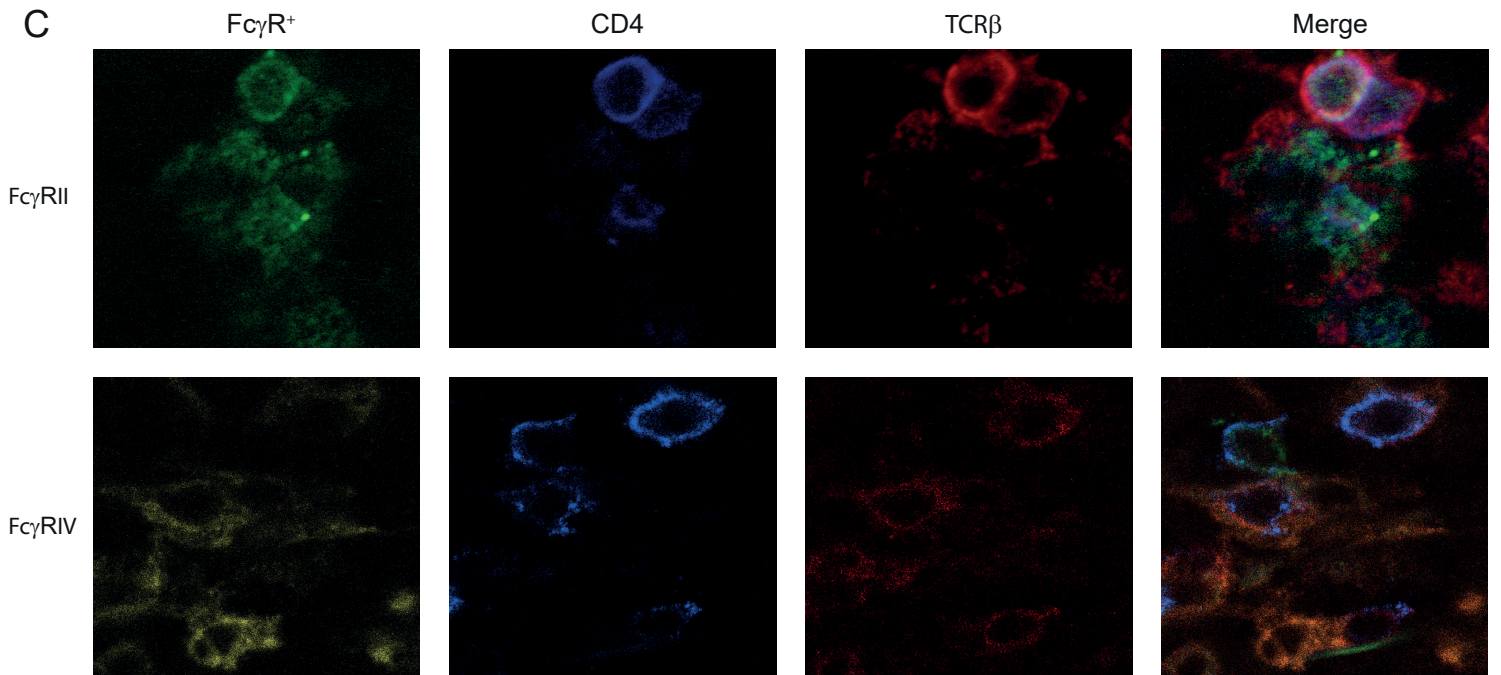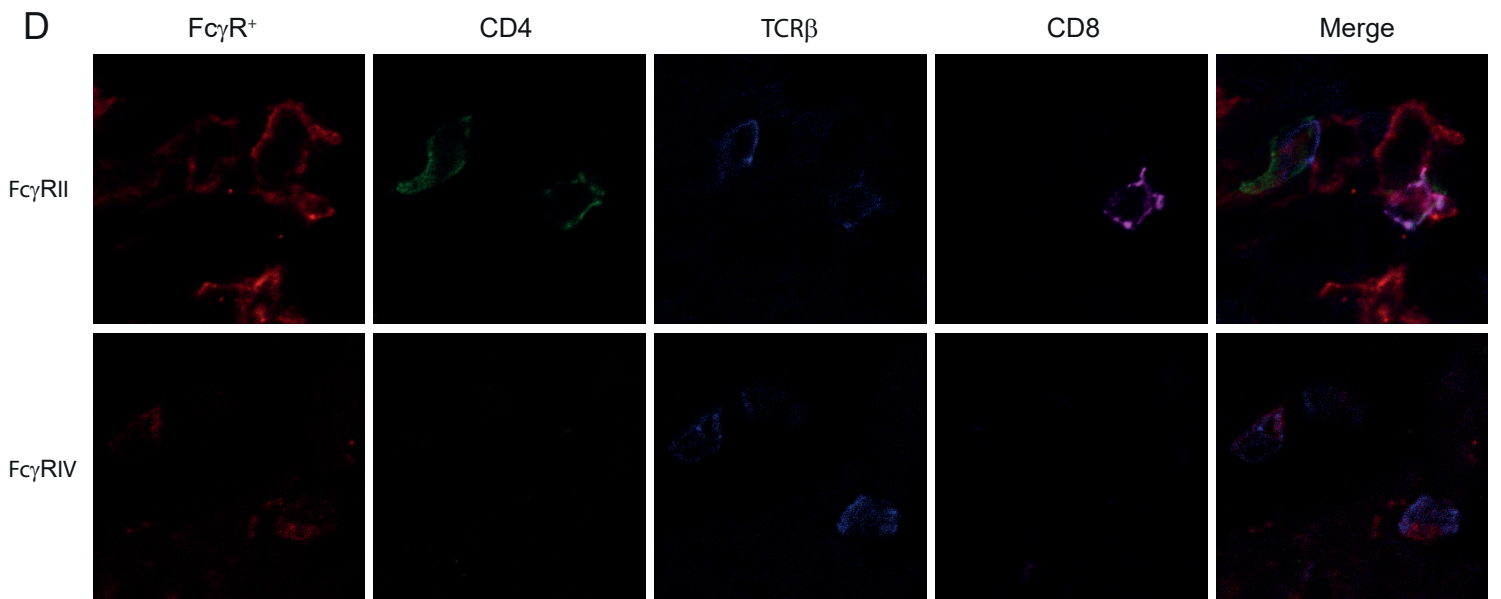

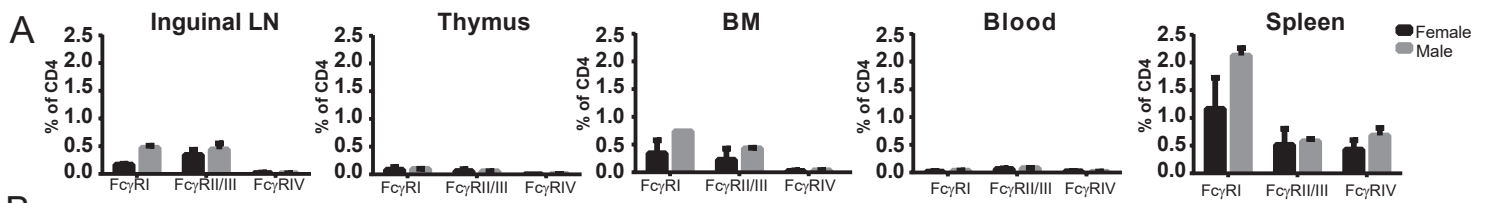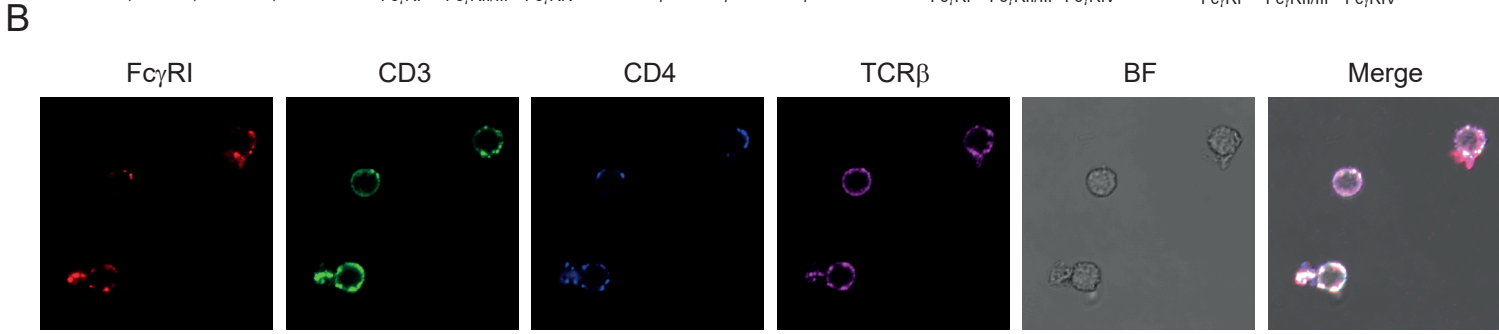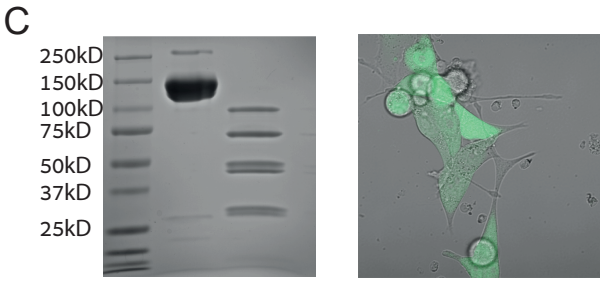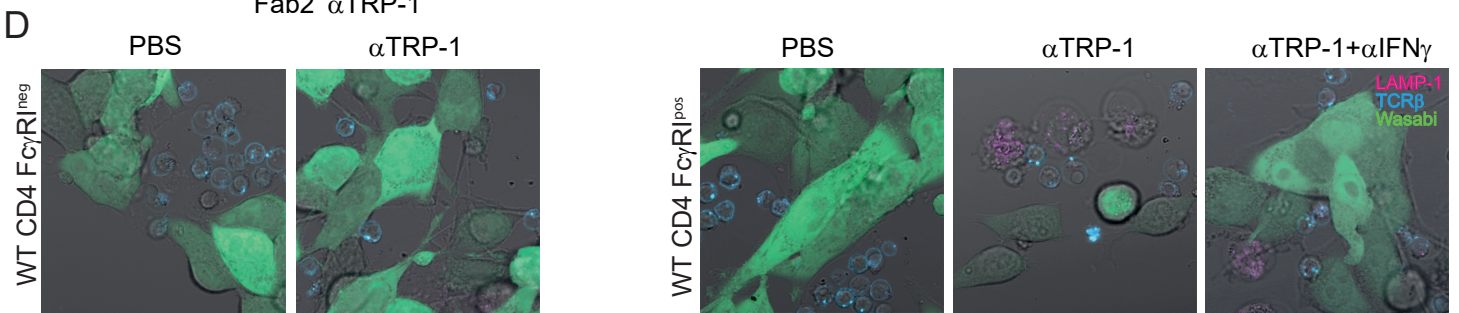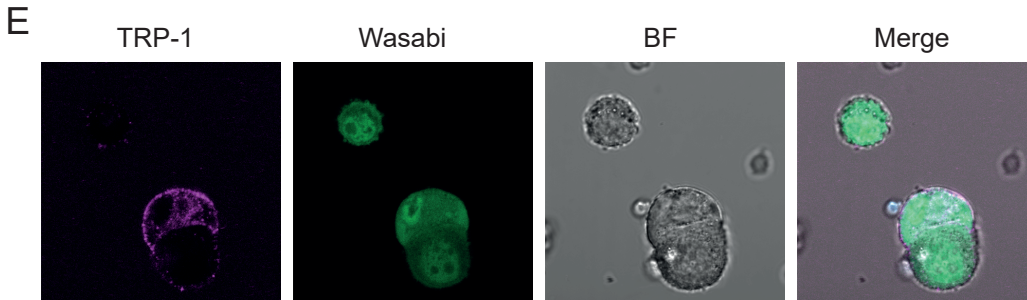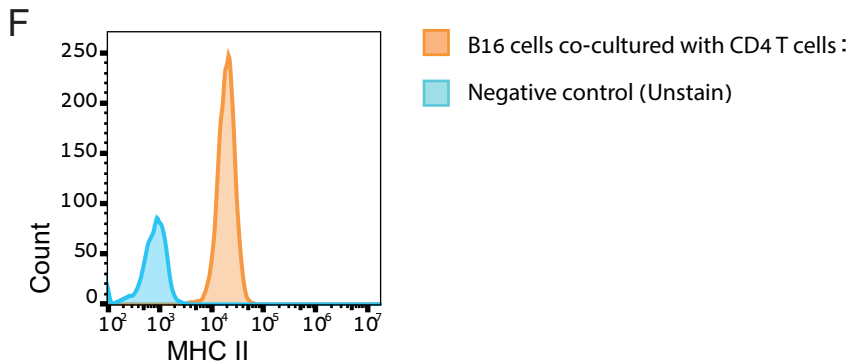

A

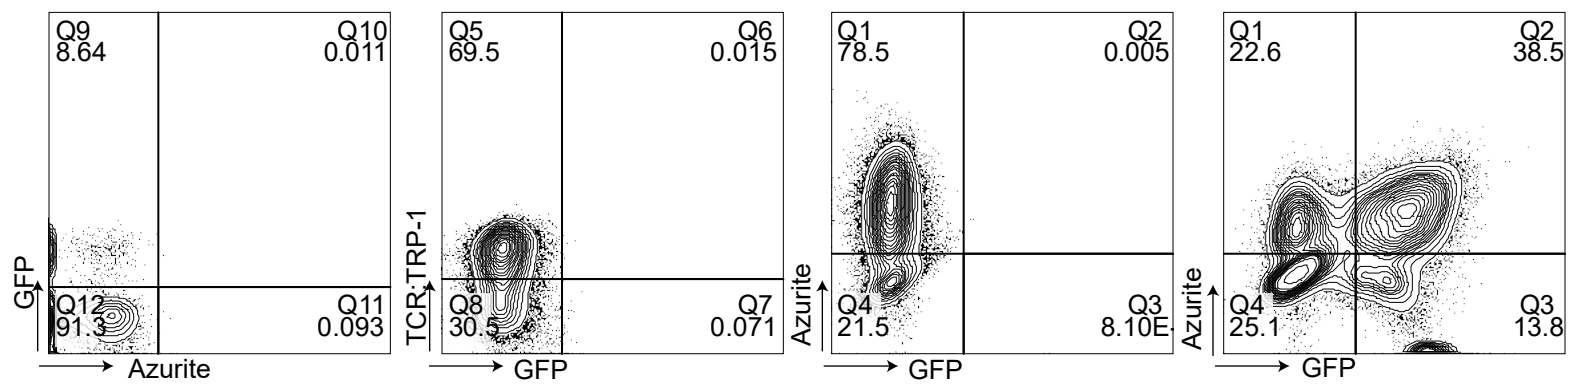

B

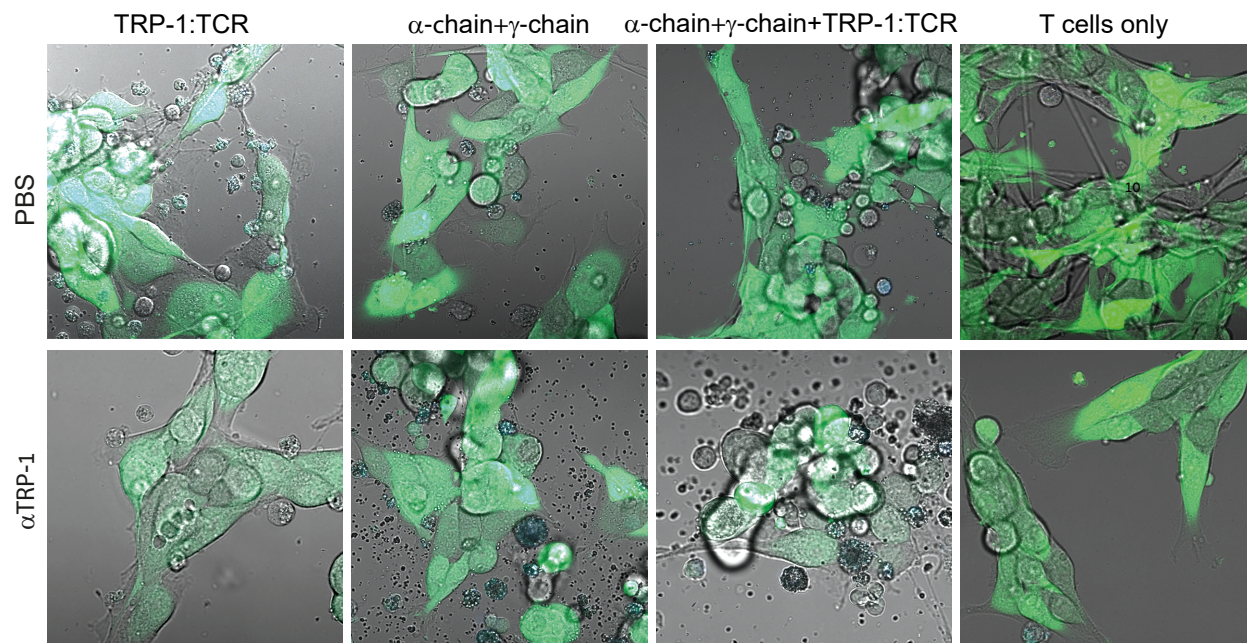

C

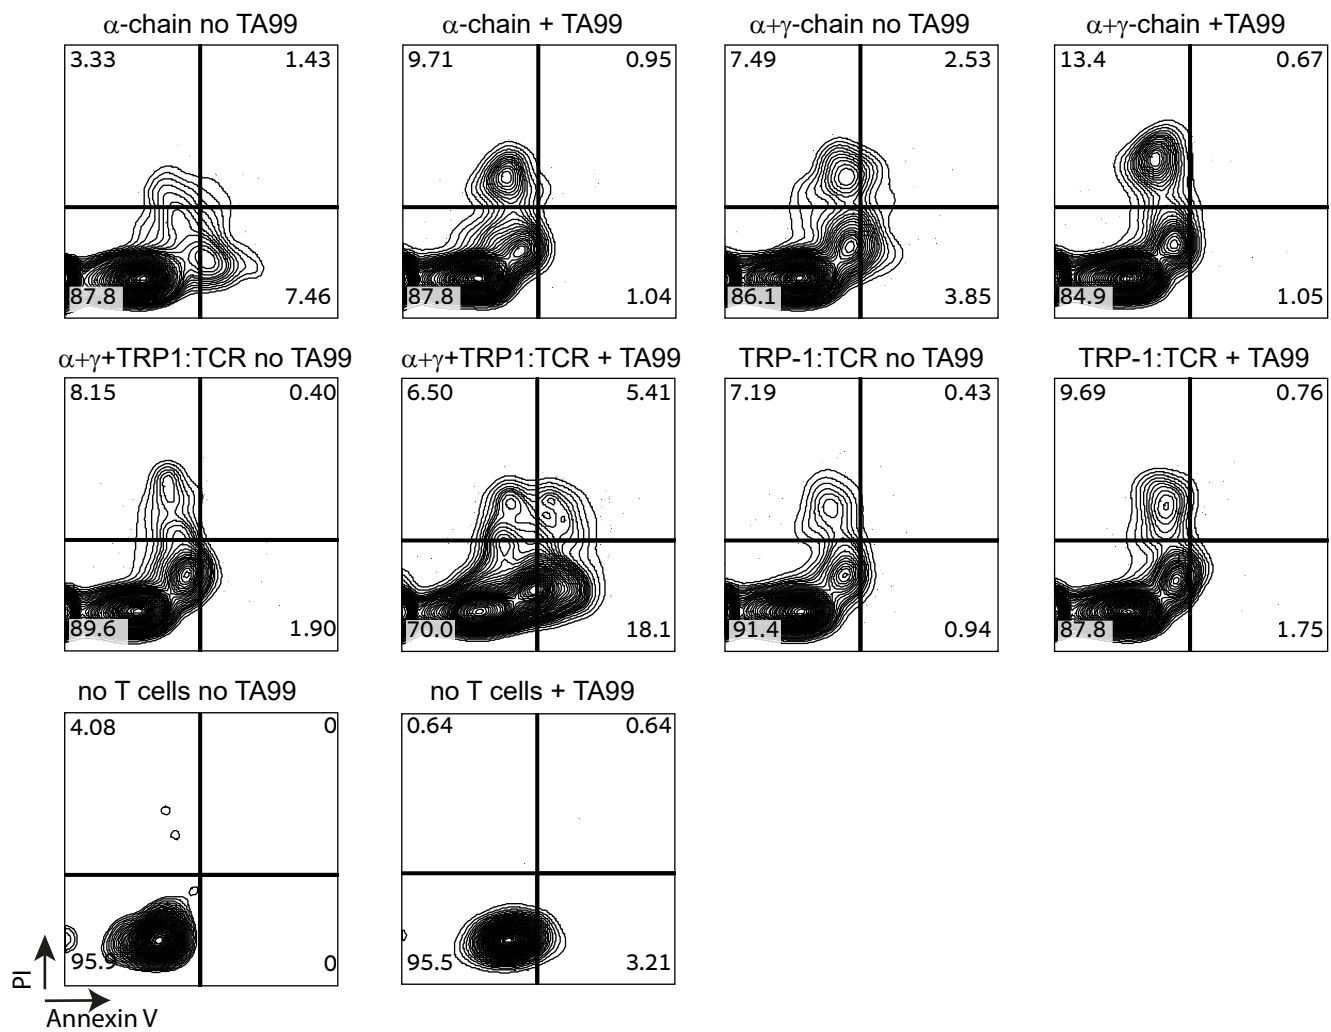

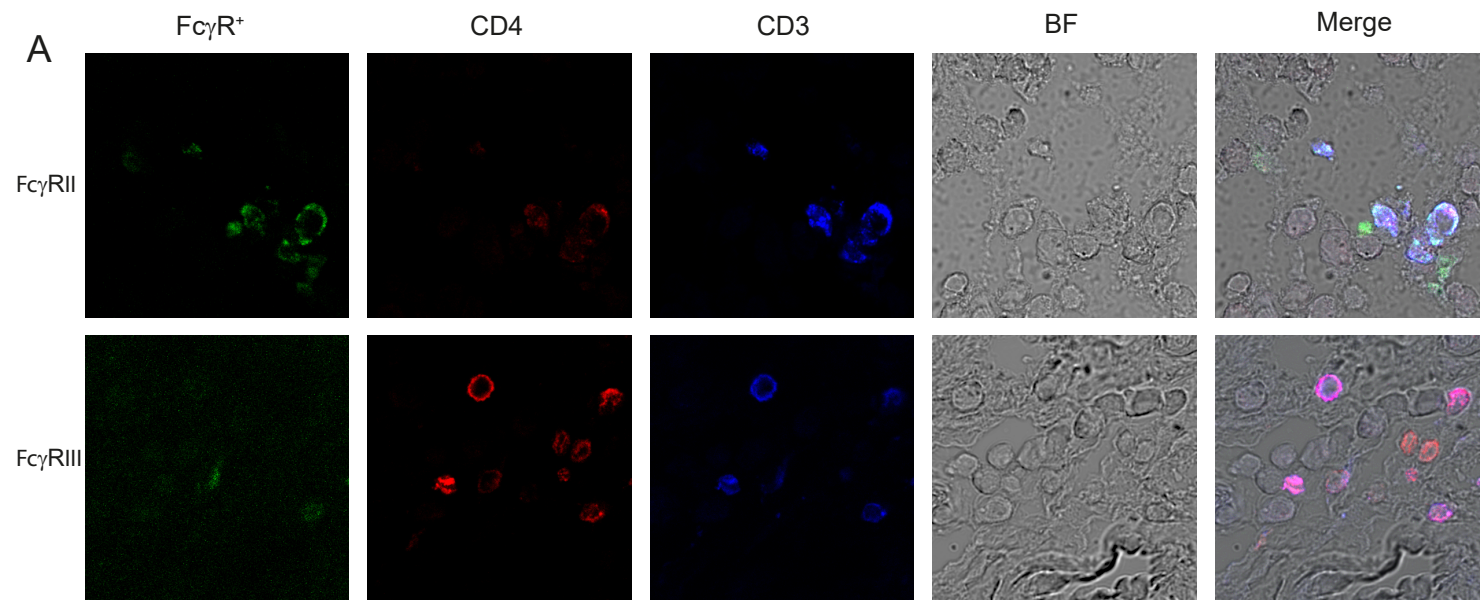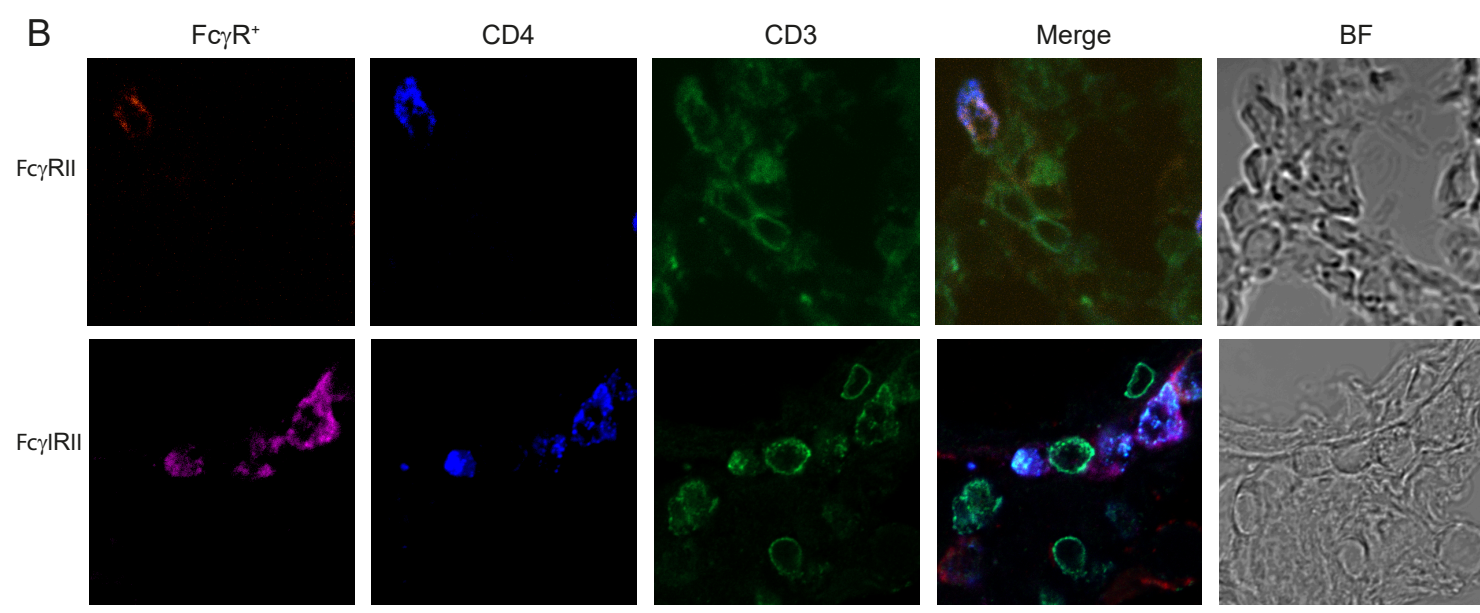

Supplement: jci-129-127590-s029.pdf [file jci-129-127590-s029.pdf]
